# Supplementary material
Source: publisher figshare collection journal article supplement (https://asha.figshare.com/articles/dataset/_/16755289)
Supplement: Supplementary file 1 [file 1]

## Supplemental Material S1. Sample AR program plan.

### Session 1 (baseline)

- Administer the COSI and PROMIS
- Counseling
  - Hearing loss journey
  - Amplification journey
  - Activities of daily living
- Education
  - Discuss ear anatomy & physiology
  - Discuss CI vs. hearing aid amplification
- Auditory Training
  - Synthetic 1.0
- Homework
  - Synthetic 2.0 and Analytic 3.0

### Session 2

- Counseling
  - Preparing for a difficult listening situation
- Education
  - Factors affecting speech understanding
- AT Plan
  - Analytic 3.1
- Homework
  - Practice same exercises at home
    - Synthetic 3.10 and Analytic 3.2

### Session 3

- Education
  - What is ADA and what are your rights?
  - <https://www.dol.gov/general/topic/disability/ada#:~:text=The%20Americans%20with%20Disabilities%20Act,local%20government'%20programs%20and%20services.>
  - <https://www.hearingloss.org/hearing-loss-time-of-coronavirus/>
  - <https://www.hearingloss.org/programs-events/advocacy/know-your-rights/ada/>
- Counseling
  - Discuss workplace conditions and potential solutions to improve telecommunication at work
- AT Plan
  - Synthetic 4.0 and Analytic 3.10

- Homework
  - Practice exercises at home
    - Synthetic 10 and Analytic 3.13

#### Session 4

- Counseling
  - Communication styles
- Education
  - Repair strategies
  - Introduce android app - Heroes & Hear Coach
- AT Plan
  - Synthetic 4.2 and Analytic 3.16
- Homework
  - Practice same exercises at home
    - Synthetic 10.1 and Analytic 3.15

#### Session 5

- Counseling
  - Invite communication partner; discuss effects of hearing loss and CI use on patient and spouse
- Education
  - Speechreading and repair strategies
  - Model auditory training methods
  - Show Cochlear communication corner
- AT Plan
  - Synthetic 6.0 and Analytic 3.19
- Homework
  - Practice similar exercises at home

#### Session 6

- Re-administer COSI and PROMIS
- Counseling/education
  - Progress with CI
  - Changes in communication style (move toward assertive communication)
  - Who to contact for troubleshooting
- Email post-program survey and resources for independent practice
