# Supplementary material
Source: publisher figshare collection journal article supplement (https://asha.figshare.com/articles/dataset/_/16755289)
Supplement: Supplementary file 2 [file 1]

## Supplemental Material S2. Sample picture list for training environmental sounds.

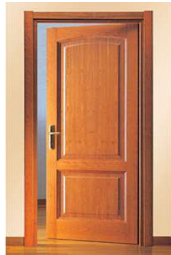

Door Slam

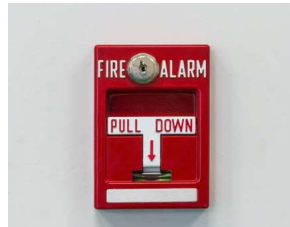

Fire Alarm

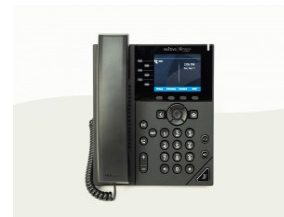

Phone Ringing

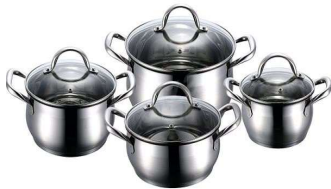

Pots

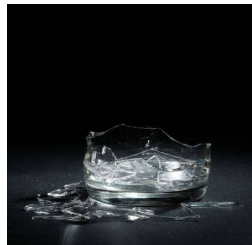

Glass Breaking

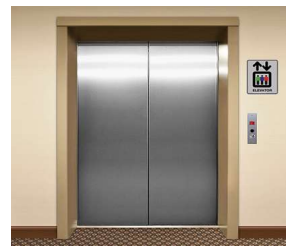

Elevator Ding

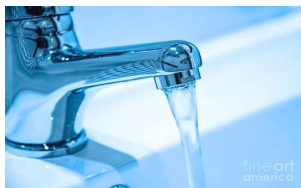

Running Water

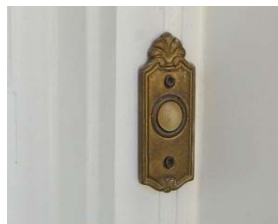

Door Bell

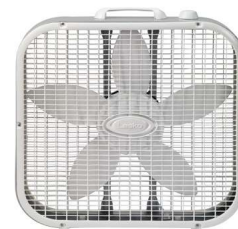

Fan

*Full picture list is publicly available at*

*[https://drive.google.com/file/d/1bV7AtLvAMRX\\_04m2XPOVI7HnYI5nqpNF/view?usp=sharing](https://drive.google.com/file/d/1bV7AtLvAMRX_04m2XPOVI7HnYI5nqpNF/view?usp=sharing)*
