# Supplementary material
Source: publisher figshare collection journal article supplement (https://asha.figshare.com/articles/dataset/_/16755289)
Supplement: Supplementary file 3 [file 1]

## Supplemental Material S3. Sample song list for music training.

Initials:

Date:

### Name That Tune!

**1) This tune is:**

- a) YMCA x The Village People
- b) The National Anthem
- c) Thriller x Michael Jackson
- d) Happy Birthday

**2) This tune is:**

- a) Jingle Bell Rock
- b) Itsy Bitsy Spider
- c) (You Gotta) Fight for Your Right (To Party) x The Beastie Boys
- d) Happy Birthday

**3) This tune is:**

- a) Twinkle Twinkle
- b) Yankee Doodle
- c) When Doves Cry x Prince
- d) Respect x Aretha Franklin

**4) This tune is:**

- a) Thriller x Michael Jackson
- b) Stayin' Alive x The Bee Gees
- c) The National Anthem
- d) YMCA x The Village People

**5) (Fill in the blank) This tune is:**

---
